# Supplementary material for: Programmed death-ligand 1 regulates ameloblastoma growth and recurrence
Source: Springer Nature journal article supplement (doi:10.1038/s41368-025-00364-w), 2025-04-16
Supplement: MOESM1 [file 41368_2025_364_MOESM1_ESM.pdf]

## **Supplementary materials**

### **PD-L1 regulates ameloblastoma growth and recurrence**

Lin-Zhou Zhang<sup>1\*</sup>, Hao Lin<sup>1\*</sup>, Jia-Jie Liang<sup>1</sup>, Xuan-Hao Liu<sup>1</sup>, Chen-Xi Zhang<sup>1</sup>,  
Qi-Wen Man<sup>1,2</sup>, Rui-Fang Li<sup>1,2</sup>, Yi Zhao<sup>1,3, #</sup>, Bing Liu<sup>1,2, #</sup>

<sup>1</sup>State Key Laboratory of Oral & Maxillofacial Reconstruction and Regeneration,  
Key Laboratory of Oral Biomedicine Ministry of Education, Hubei Key  
Laboratory of Stomatology, School & Hospital of Stomatology, Wuhan  
University, Wuhan 430079, China.

<sup>2</sup>Department of Oral and Maxillofacial Surgery, School and Hospital of  
Stomatology, Wuhan University, Wuhan 430079, China.

<sup>3</sup>Department of Prosthodontics, School and Hospital of Stomatology, Wuhan  
University, Wuhan, China.

\*Co-first author

#Correspondence: zhao\_yi@whu.edu.cn; liubing9909@whu.edu.cn

## Supplementary Figure and Figure Legends

**Figure S1**

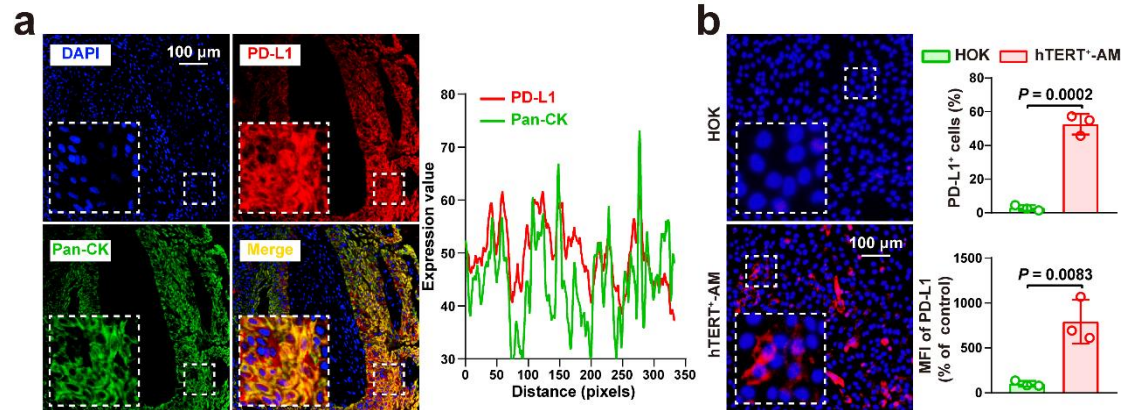

**Figure S1. Immunofluorescence staining analysis of PD-L1 expression in**

### **AM cells**

**a** Immunofluorescence staining for PD-L1 (red) and Pan-CK (green) in AM tissues. The fluorescence intensity profiles are plotted on the right. Scale bar, 100  $\mu\text{m}$ . **b** Representative immunofluorescence images of PD-L1 in human oral keratinocytes (HOKs) and hTERT<sup>+</sup>-AM cells (left). Quantification of the percentage of PD-L1<sup>+</sup> cells and the mean fluorescence intensity (MFI) of PD-L1 in these cells (right). Scale bar, 100  $\mu\text{m}$ .

**Figure S2**

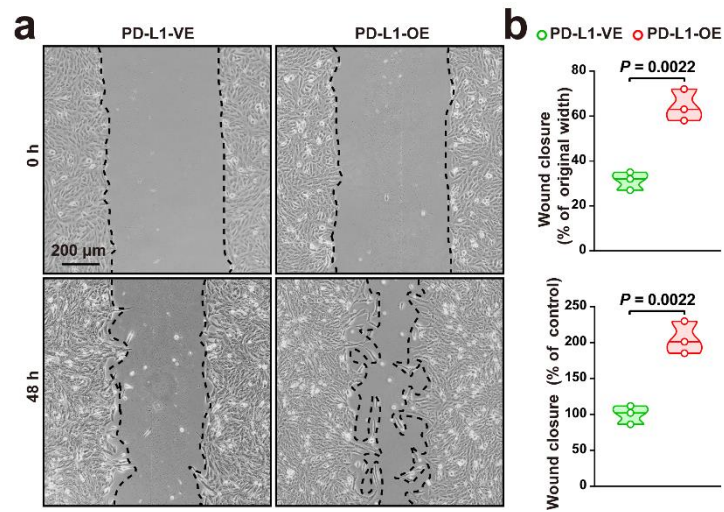

**Figure S2. Evaluation of migration ability in PD-L1-VE and PD-L1-OE hTERT<sup>+</sup>-AM cells**

**a** Representative images of wound healing in PD-L1-VE and PD-L1-OE hTERT<sup>+</sup>-AM cells at 0 h and 48 h post-scratch (left). **b** Quantitative analysis of the percentage of wound closure (right). Scale bar, 200  $\mu$ m.

**Figure S3**

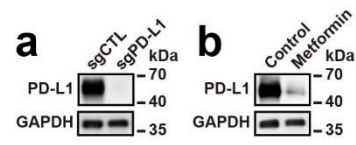

**Figure S3. Western blot analysis of PD-L1 expression in hTERT<sup>+</sup>-AM cells following PD-L1 manipulation.**

**Figure S4**

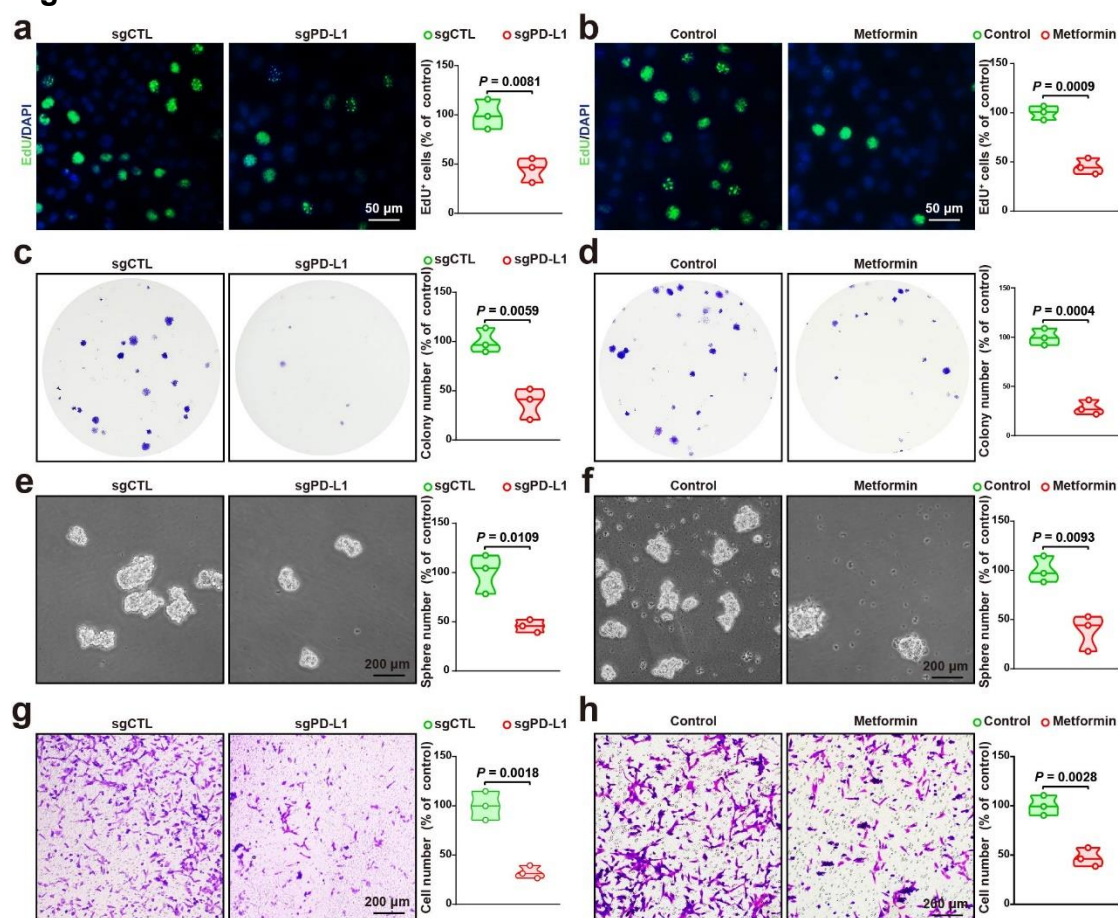

**Figure S4. Targeting PD-L1 inhibits self-renewal capacity, tumorigenesis, and invasiveness in hTERT<sup>+</sup>-AM cells**

**a** Representative image of EdU staining (green) in sgControl (sgCTL) and sgPD-L1 hTERT<sup>+</sup>-AM cells, with nuclei counterstained by DAPI (blue). Quantitative analysis of EdU-positive hTERT<sup>+</sup>-AM cells (right). Scale bar, 50  $\mu$ m.

**b** Representative images of EdU staining (green) in control and metformin-treated hTERT<sup>+</sup>-AM cells. Scale bar, 50  $\mu$ m. **c** Representative images showing the colony formation of sgCTL and sgPD-L1 hTERT<sup>+</sup>-AM cells stained with crystal violet (left). Quantitative analysis of the number of crystal violet-stained colony (right). **d** Representative images of colony formation in control and metformin-treated hTERT<sup>+</sup>-AM cells stained with crystal violet. Quantitative

analysis of the number of crystal violet-stained colony (right). **e** Representative images of spheroid formation in sgCTL and sgPD-L1 hTERT<sup>+</sup>-AM cells (left). Quantitative analysis of the number of spheres (right). Scale bar, 200  $\mu$ m. **f** Representative images of spheroid formation in control and metformin-treated hTERT<sup>+</sup>-AM cells. Quantitative analysis of the number of spheres (right). Scale bar, 200  $\mu$ m. **g** Representative images showing the invasive ability of sgCTL and sgPD-L1 hTERT<sup>+</sup>-AM cells, stained with crystal violet (left). Quantitative analysis of the number of invading hTERT<sup>+</sup>-AM cells (right). Scale bar, 200  $\mu$ m. **h** Representative images of the invasive ability of control and metformin-treated hTERT<sup>+</sup>-AM cells, stained with crystal violet (left). Quantitative analysis of the number of invading hTERT<sup>+</sup>-AM cells (right). Scale bar, 200  $\mu$ m. Data are expressed as mean  $\pm$  SD and analyzed using a two-tailed unpaired Student's t-test (**a-h**). All results are representative of three independent experiments.

**Figure S5**

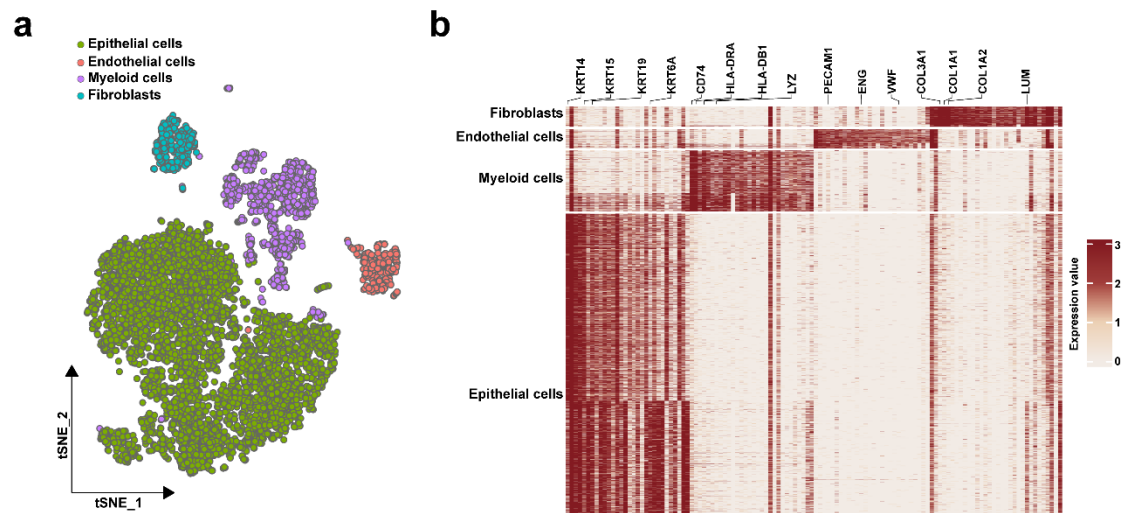

**Figure S5. Single-cell RNA sequencing uncovers cell subpopulations of AM tissues**

**a** t-SNE plot of single cells from the scRNA-seq analysis labeled by cell type. **b** Heatmap of marker genes for different cell types.



**Figure S6**

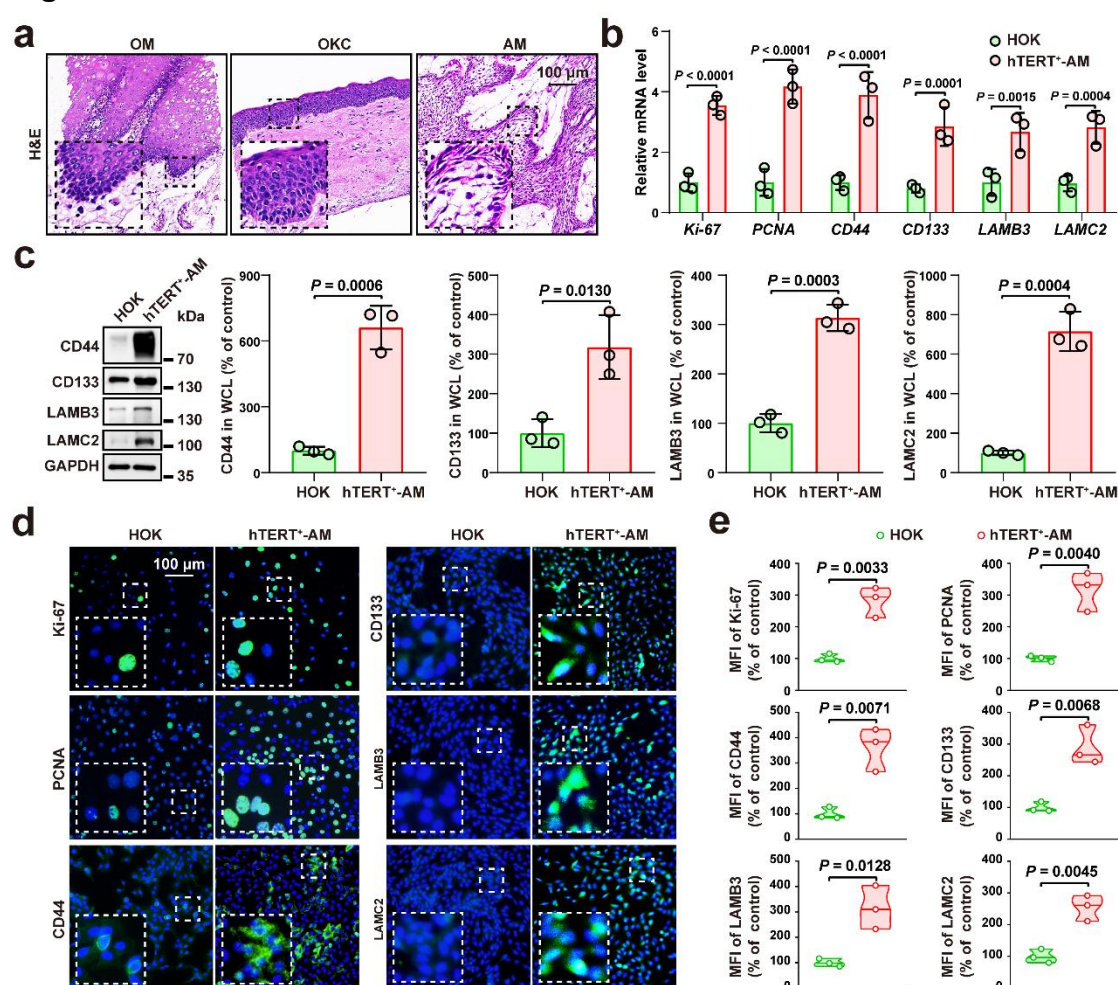

**Figure S6. Increased proliferation, stemness, and p-EMT-related protein expression in ameloblastoma cells**

**a** Representative hematoxylin and eosin (H&E) in oral mucosa (OM), odontogenic keratocyst (OKC), and AM tissues. **b** Quantification for the mRNA levels of *MKI67*, *PCNA*, *CD44*, *CD133*, *LAMB3*, and *LAMC2* in HOK and AM cells. **c** Western blot analysis of CD44, CD133, LAMB3, and LAMC2 expression in HOK and hTERT<sup>+</sup>-AM cells. **d** Representative immunofluorescence staining for Ki-67, PCNA, CD44, CD133, LAMB3, and LAMC2 in HOK and hTERT<sup>+</sup>-AM cells. **e** Quantification of mean fluorescence intensity (MFI) of proliferation-, stemness-, and p-EMT-related markers between HOK and hTERT<sup>+</sup>-AM cells.



Data are presented as mean  $\pm$  SD. Statistical significance was determined by two-way ANOVA (**b**) and two-tailed unpaired Student's t-test (**c**, **e**).

**Figure S7**

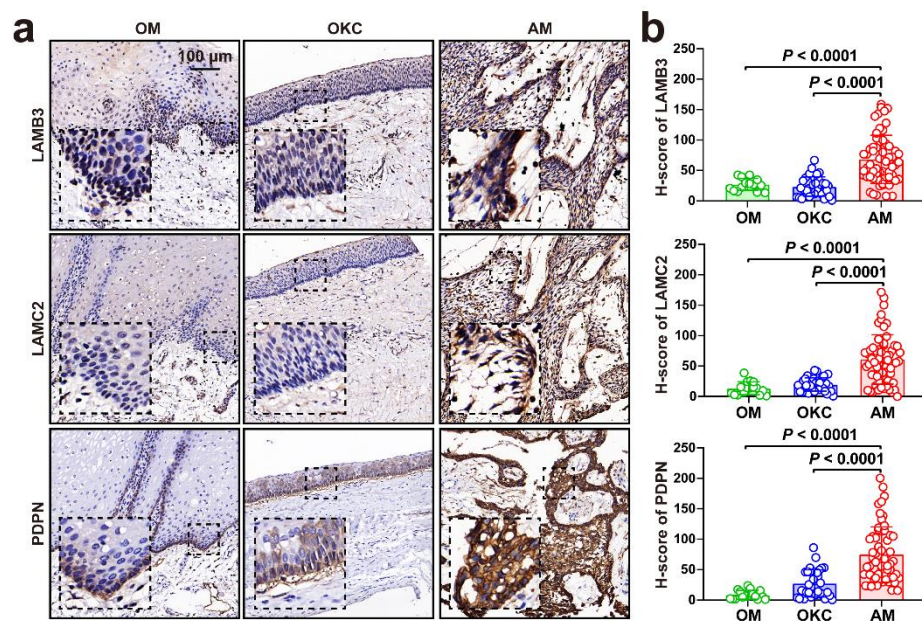

**Figure S7. Enhanced expression of p-EMT-related proteins in human ameloblastoma**

**a** Representative IHC images of p-EMT markers (LAMB3, LAMC2, and PDPN) in OM (n = 16), OKC (n = 33), and AM (n = 60) tissues. Scale bar, 100  $\mu$ m. **b** Quantification of H-scores for p-EMT marker LAMB3, LAMC2, and PDPN. Data are presented as mean  $\pm$  SD. Statistical significance was determined by two-tailed unpaired Student's t-test.

**Figure S8**

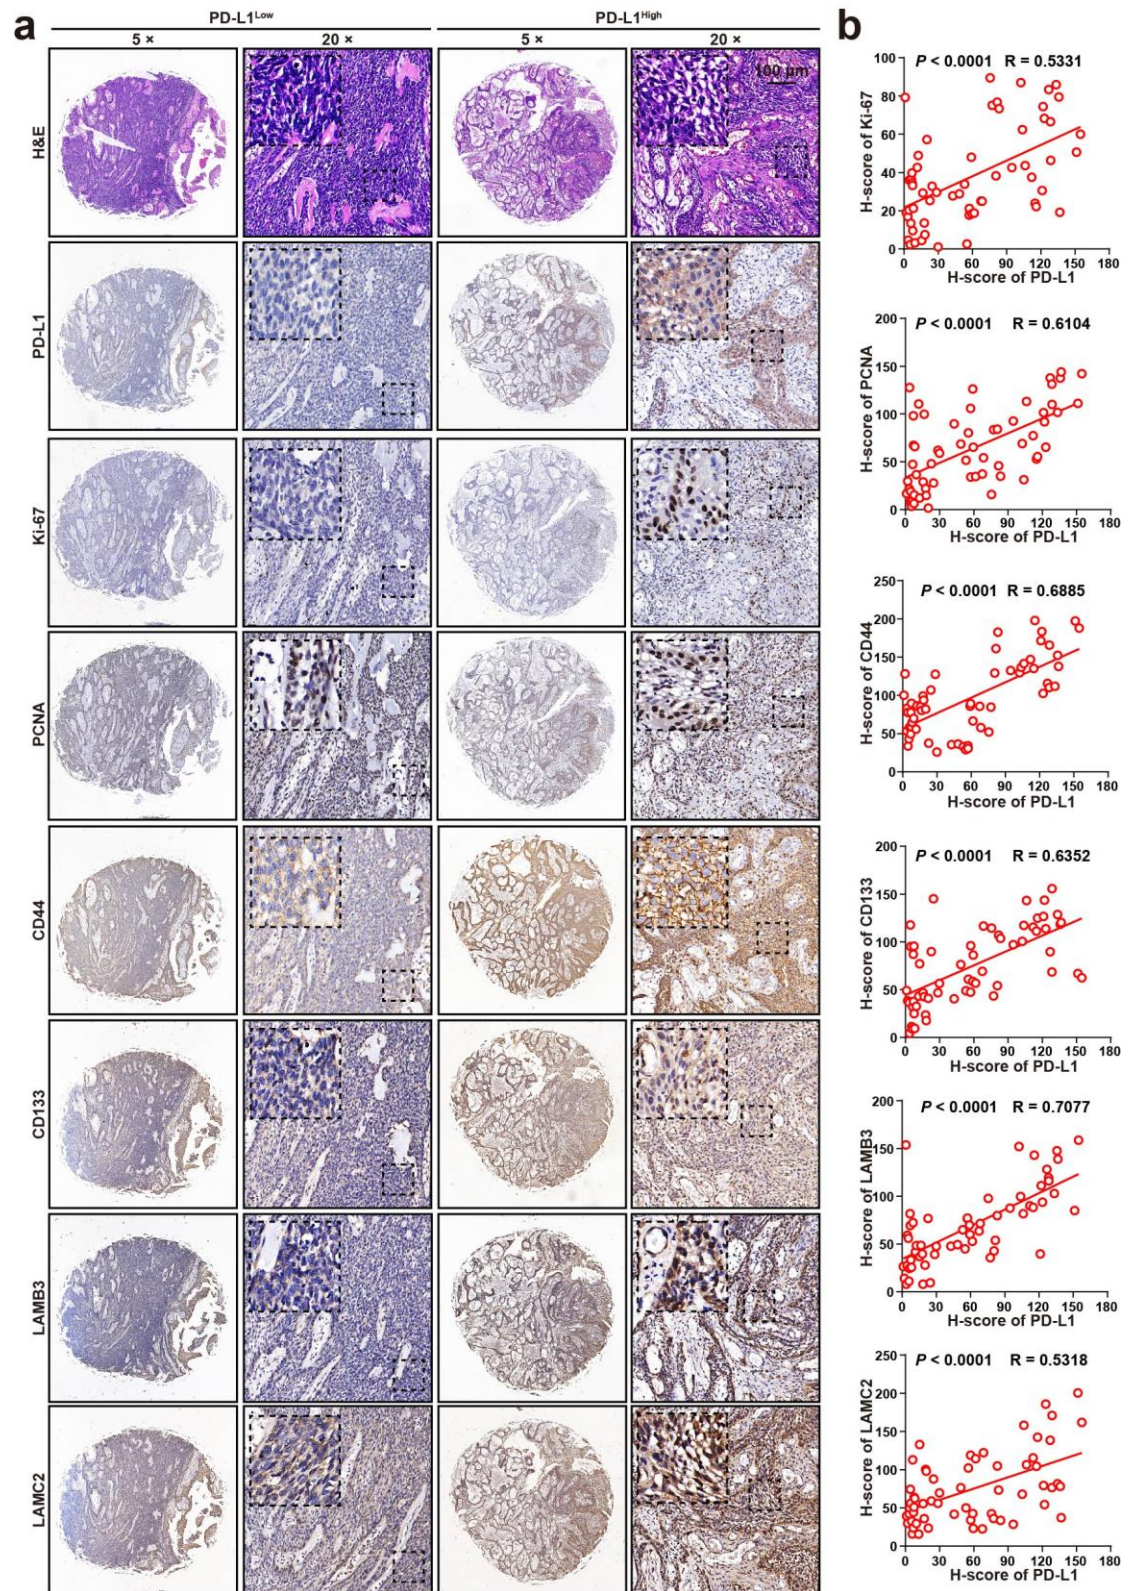

**Figure S8. PD-L1 expression is positively associated with the levels of proliferation, stemness, and p-EMT-related factors in human AM patients**

**a** Representative image of H&E, PD-L1, Ki-67, PCNA, CD44, CD133, LAMB3, and LAMC2 staining in AM tissues with low PD-L1 expression (PD-L1<sup>Low</sup>) (n = 26) and high PD-L1 expression (PD-L1<sup>High</sup>) (n = 34). Images are shown at 5× and 20× magnifications. Scale bar, 100 μm. **b** Pearson correlation analysis between PD-L1 and Ki-67, PCNA, CD44, CD133, LAMB3, and LAMC2 expression in AM tissues.



**Figure S9**

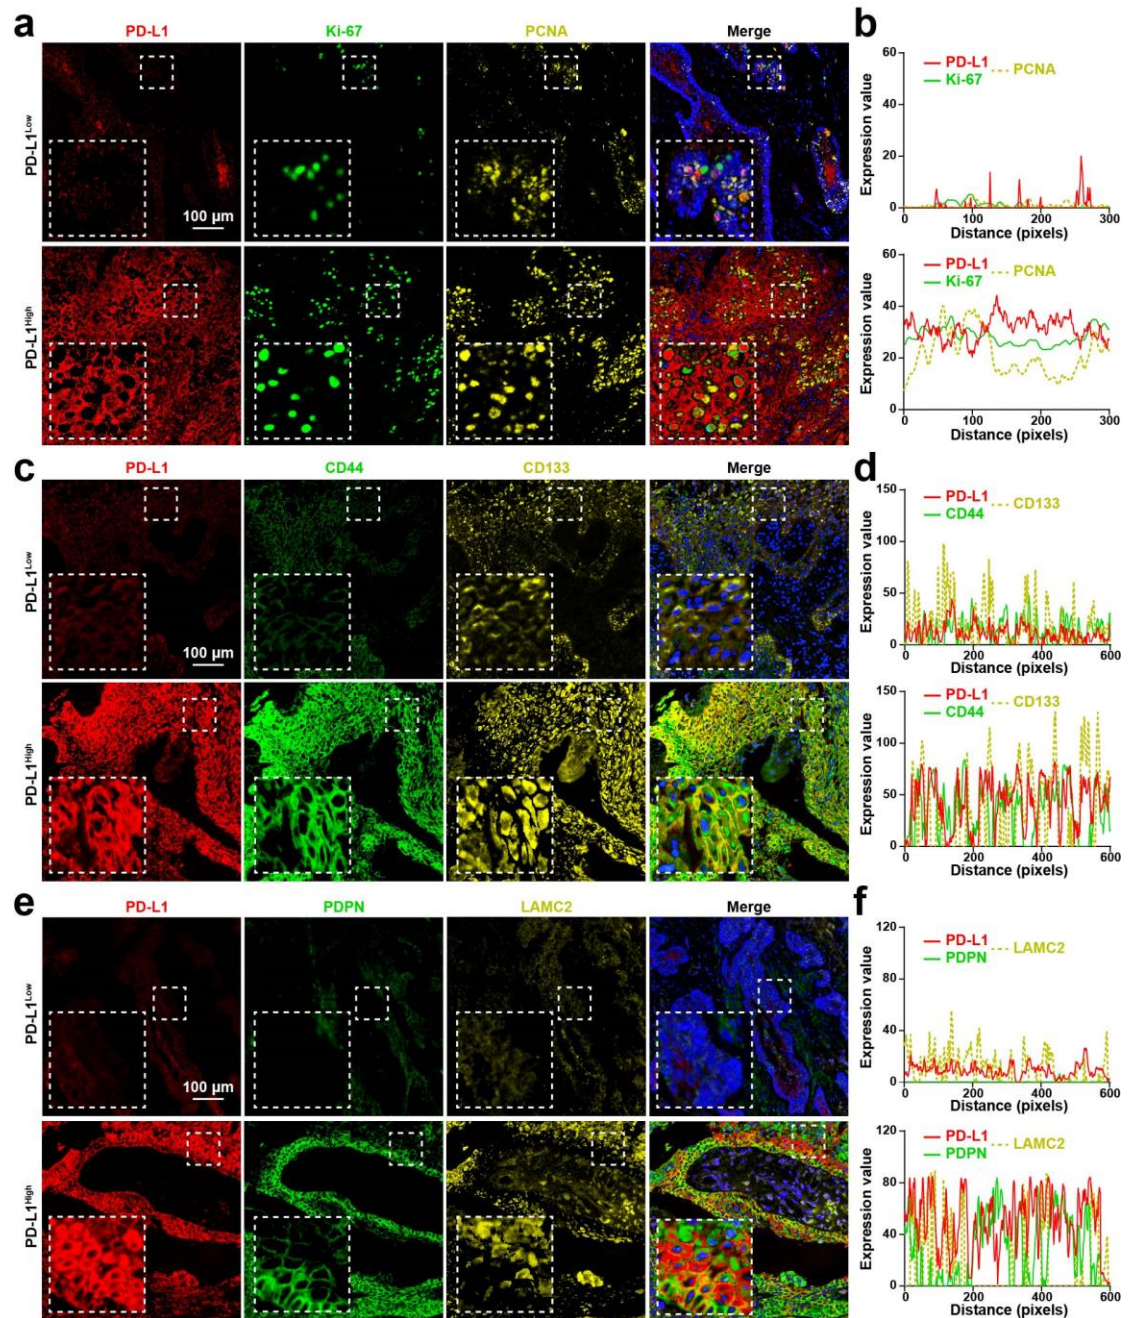

**Figure S9. Co-localization of PD-L1 with proliferation, stemness, and p-EMT-related markers in human ameloblastoma**

**a** Representative image of PD-L1 co-staining with Ki-67 or PCNA in ameloblastoma tissues with PD-L1<sup>Low</sup> and PD-L1<sup>High</sup> expression. Scale bar, 100 μm. **b** Quantitative analysis of the fluorescence intensity profiles reveals the co-

expression patterns of PD-L1 with Ki-67 and PCNA in ameloblastoma tissues.

**c** Representative images of PD-L1 co-staining with CD44 or CD133 in ameloblastoma tissues with PD-L1<sup>Low</sup> and PD-L1<sup>High</sup> expression. Scale bar, 100  $\mu$ m. **d** Quantitative analysis of the fluorescence intensity profiles highlights the co-expression patterns of PD-L1 with CD44 and CD133 in ameloblastoma tissues. **e** Representative images of PD-L1 co-staining with PDPN or LAMC2 in ameloblastoma tissues with PD-L1<sup>Low</sup> and PD-L1<sup>High</sup> expression. Scale bar, 100  $\mu$ m. **f** Quantitative assessment of the fluorescence intensity profiles reveals the co-expression patterns of PD-L1 with PDPN and LAMC2 in ameloblastoma tissues.

**Figure S10**

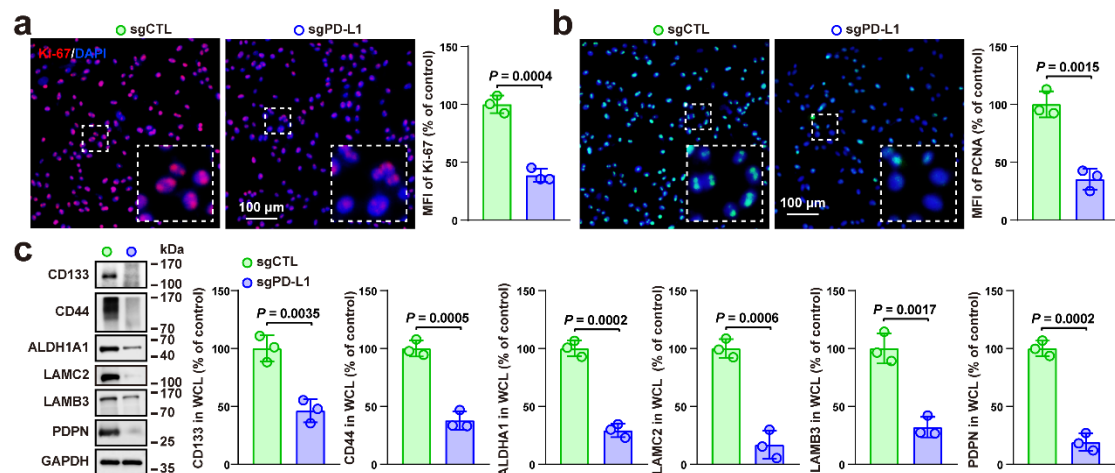

**Figure S10. PD-L1 modulates the expression of molecular networks associated with proliferative capacity, cellular stemness maintenance, and p-EMT activation**

**a-b** Immunofluorescence staining for Ki-67 (**a**) and PCNA (**b**) was conducted in hTERT<sup>+</sup>-AM cells subjected to PD-L1 knockdown (sgPD-L1) and nontargeting control (sgCTL) conditions (left). The quantification of the MFI for Ki-67 and PCNA in these cells offered further comparative analysis of proliferative markers in response to PD-L1 modulation (right). **c** Western blotting for stemness- and p-EMT-related protein expression was conducted on hTERT<sup>+</sup>-AM cells transfected with sgPD-L1 and sgCTL. The data are presented as the means  $\pm$  SDs. Statistical significance was assessed via two-tailed unpaired Student's t test (**a-c**).



**Figure S11**

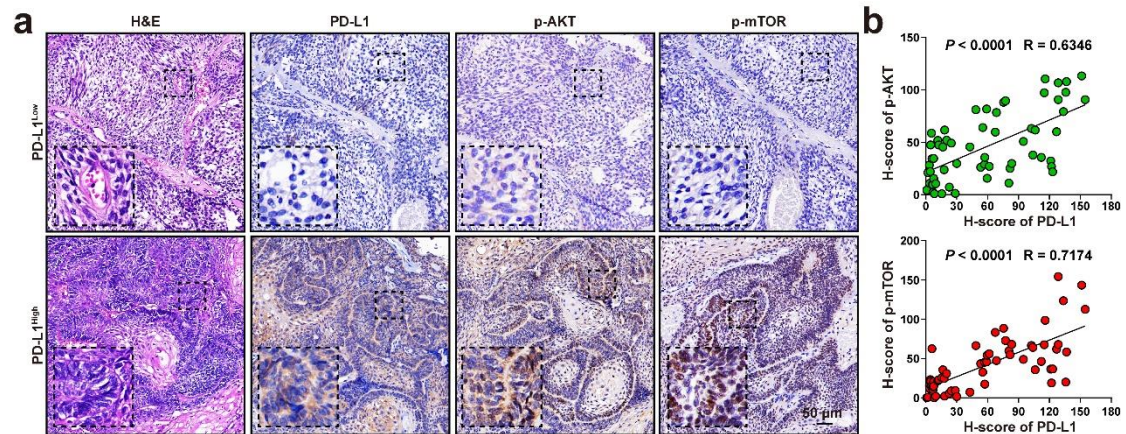

**Figure S11. The expression level of PD-L1 is positively correlated with p-AKT and p-mTOR expression in human ameloblastoma**

**a** Representative hematoxylin and eosin (H&E) and immunohistochemical (IHC) images of PD-L1, p-AKT, and p-mTOR expression in PD-L1<sup>Low</sup> and PD-L1<sup>High</sup> AM tissues. **b** Correlation analysis between PD-L1 levels and p-AKT and p-mTOR expression in AM tissues.

**Figure S12**

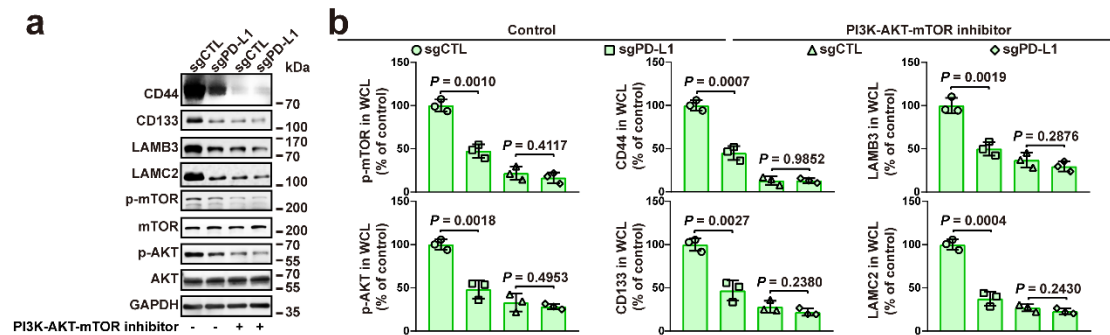

**Figure S12. PD-L1 modulates the expression of proteins related to stemness and p-EMT via activation of the PI3K-AKT-mTOR signaling axis**

**a** Western blotting for stemness- and p-EMT-related protein expression was conducted on hTERT<sup>+</sup>-AM cells subjected to the indicated treatments. **b** Statistical analysis of the relative expression levels of stemness- and p-EMT-related proteins. The data are presented as the means  $\pm$  SDs. Statistical significance was assessed via two-tailed unpaired Student's t test (**b**).

**Figure S13**

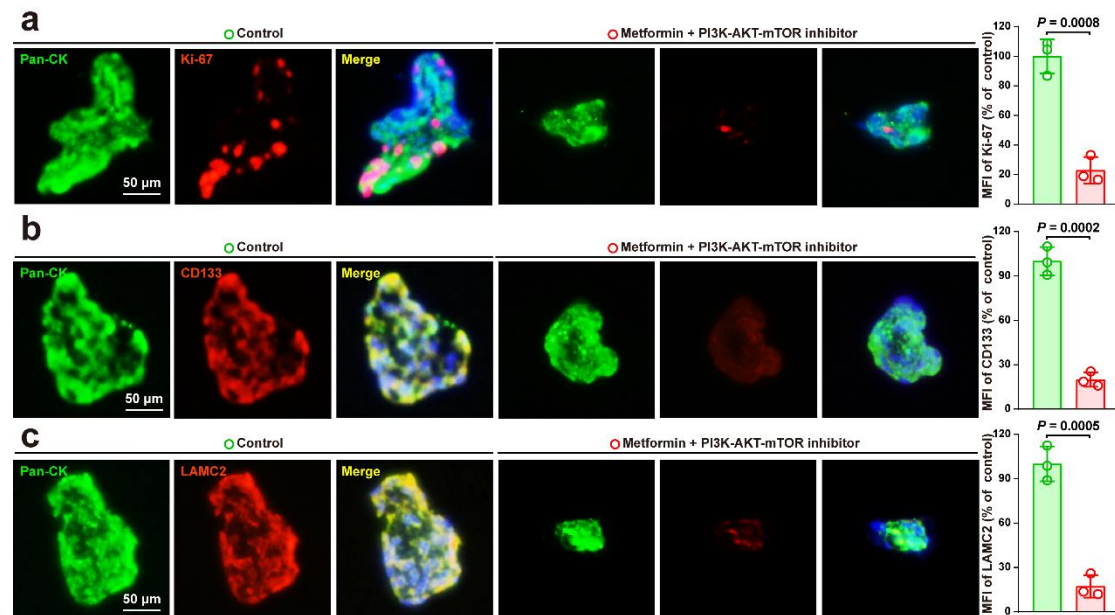

**Figure S13. Evaluation of Ki-67, CD133 and LAMC2 expression in ameloblastoma patient-derived organoids (APDOs) treated with or without a PD-L1 inhibitor**

**a-c** Immunofluorescence staining assays revealed the expression patterns of Ki-67, CD133, and LAMC2 in APDOs; the scale bar indicates 50  $\mu$ m (left panel). Quantification of the mean fluorescence intensity for Ki-67, CD133, and LAMC2 expression in APDOs subjected to PD-L1 inhibitor treatment (**a**), PI3K-AKT-mTOR inhibitor treatment (**b**), or combined treatment (**c**) is provided. The data are presented as the means  $\pm$  SDs. Statistical significance was assessed via a two-tailed unpaired Student's t test for all comparisons (**a-c**).

**Table S1**

| <b>Patient No.</b> | <b>Age</b> | <b>Gender</b> | <b>Location</b> | <b>Radiographic appearance</b> | <b>Recurrence</b> | <b>Follow-up (month)</b> |
|--------------------|------------|---------------|-----------------|--------------------------------|-------------------|--------------------------|
| 1                  | 45         | Male          | Mandible        | Conventional                   | No                | 22                       |
| 2                  | 55         | Male          | Mandible        | Conventional                   | No                | 13                       |
| 3                  | 66         | Female        | Mandible        | Conventional                   | Yes               | 9                        |
| 4                  | 29         | Male          | Mandible        | Conventional                   | No                | 18                       |
| 5                  | 58         | Female        | Mandible        | Conventional                   | No                | 36                       |
| 6                  | 11         | Male          | Mandible        | Conventional                   | No                | 43                       |
| 7                  | 29         | Male          | Mandible        | Conventional                   | No                | 6                        |
| 8                  | 72         | Male          | Maxilla         | Conventional                   | Yes               | 17                       |
| 9                  | 30         | Male          | Mandible        | Unicystic                      | No                | 56                       |
| 10                 | 17         | Male          | Mandible        | Unicystic                      | No                | 31                       |
| 11                 | 20         | Male          | Mandible        | Unicystic                      | No                | 28                       |
| 12                 | 15         | Female        | Mandible        | Unicystic                      | No                | 34                       |
| 13                 | 12         | Female        | Mandible        | Conventional                   | No                | 36                       |
| 14                 | 56         | Male          | Mandible        | Conventional                   | No                | 16                       |
| 15                 | 38         | Male          | Mandible        | Conventional                   | No                | 22                       |
| 16                 | 11         | Female        | Mandible        | Conventional                   | No                | 19                       |
| 17                 | 13         | Male          | Mandible        | Unicystic                      | Yes               | 6                        |
| 18                 | 26         | Male          | Mandible        | Unicystic                      | No                | 12                       |
| 19                 | 58         | Male          | Mandible        | Conventional                   | No                | 18                       |
| 20                 | 75         | Male          | Mandible        | Conventional                   | Yes               | 8                        |
| 21                 | 65         | Male          | Mandible        | Conventional                   | No                | 32                       |
| 22                 | 52         | Female        | Mandible        | Conventional                   | No                | 36                       |
| 23                 | 46         | Male          | Mandible        | Conventional                   | No                | 21                       |
| 24                 | 30         | Female        | Mandible        | Conventional                   | No                | 42                       |
| 25                 | 10         | Male          | Mandible        | Conventional                   | No                | 28                       |
| 26                 | 26         | Male          | Mandible        | Conventional                   | No                | 33                       |
| 27                 | 42         | Male          | Mandible        | Conventional                   | Yes               | 14                       |
| 28                 | 38         | Male          | Mandible        | Conventional                   | No                | 33                       |
| 29                 | 27         | Female        | Mandible        | Unicystic                      | No                | 27                       |
| 30                 | 39         | Female        | Mandible        | Conventional                   | Yes               | 7                        |
| 31                 | 47         | Male          | Mandible        | Conventional                   | Yes               | 6                        |
| 32                 | 44         | Male          | Mandible        | Conventional                   | No                | 42                       |
| 33                 | 25         | Female        | Mandible        | Conventional                   | No                | 28                       |
| 34                 | 40         | Male          | Mandible        | Conventional                   | Yes               | 41                       |
| 35                 | 72         | Male          | Mandible        | Conventional                   | Yes               | 18                       |
| 36                 | 18         | Male          | Mandible        | Conventional                   | Yes               | 24                       |
| 37                 | 25         | Male          | Mandible        | Conventional                   | No                | 27                       |
| 38                 | 56         | Male          | Mandible        | Conventional                   | Yes               | 10                       |
| 39                 | 24         | Male          | Mandible        | Conventional                   | Yes               | 24                       |
| 40                 | 56         | Male          | Mandible        | Conventional                   | No                | 45                       |
| 41                 | 43         | Female        | Mandible        | Unicystic                      | No                | 32                       |

|    |    |        |          |              |     |    |
|----|----|--------|----------|--------------|-----|----|
| 42 | 57 | Female | Mandible | Conventional | Yes | 26 |
| 43 | 40 | Male   | Mandible | Conventional | Yes | 7  |
| 44 | 37 | Male   | Mandible | Conventional | Yes | 12 |
| 45 | 33 | Female | Mandible | Unicystic    | No  | 34 |
| 46 | 63 | Female | Mandible | Conventional | No  | 36 |
| 47 | 56 | Male   | Maxilla  | Conventional | Yes | 18 |
| 48 | 34 | Male   | Mandible | Conventional | No  | 25 |
| 49 | 40 | Male   | Mandible | Conventional | Yes | 16 |
| 50 | 36 | Female | Mandible | Conventional | No  | 33 |
| 51 | 19 | Male   | Mandible | Conventional | Yes | 19 |
| 52 | 34 | Female | Maxilla  | Conventional | No  | 56 |
| 53 | 22 | Male   | Mandible | Conventional | No  | 41 |
| 54 | 65 | Male   | Mandible | Conventional | Yes | 19 |
| 55 | 47 | Male   | Maxilla  | Conventional | Yes | 8  |
| 56 | 55 | Male   | Mandible | Conventional | No  | 28 |
| 57 | 13 | Male   | Mandible | Conventional | No  | 16 |
| 58 | 62 | Male   | Maxilla  | Conventional | Yes | 6  |
| 59 | 46 | Female | Mandible | Conventional | No  | 52 |
| 60 | 48 | Male   | Mandible | Conventional | Yes | 8  |

**Table S1. Demographic characteristics of 60 patients with ameloblastoma.**

**Table S2**

| Patient No. | Age | Gender | Location | Radiographic appearance |
|-------------|-----|--------|----------|-------------------------|
| 1           | 33  | Male   | Maxilla  | Multilocular            |
| 2           | 26  | Male   | Maxilla  | Unilocular              |
| 3           | 22  | Male   | Mandible | Multilocular            |
| 4           | 52  | Male   | Maxilla  | Unilocular              |
| 5           | 24  | Male   | Mandible | Unilocular              |
| 6           | 35  | Female | Both     | Multilocular            |
| 7           | 18  | Female | Mandible | Unilocular              |
| 8           | 28  | Female | Mandible | Unilocular              |
| 9           | 40  | Female | Mandible | Multilocular            |
| 10          | 42  | Female | Mandible | Unilocular              |
| 11          | 19  | Male   | Mandible | Multilocular            |
| 12          | 20  | Male   | Mandible | Unilocular              |
| 13          | 18  | Male   | Mandible | Unilocular              |
| 14          | 28  | Male   | Both     | Multilocular            |
| 15          | 26  | Female | Maxilla  | Unilocular              |
| 16          | 43  | Male   | Mandible | Multilocular            |
| 17          | 18  | Male   | Mandible | Unilocular              |
| 18          | 22  | Male   | Maxilla  | Multilocular            |
| 19          | 36  | Male   | Mandible | Unilocular              |
| 20          | 17  | Female | Mandible | Unilocular              |
| 21          | 54  | Male   | Both     | Unilocular              |
| 22          | 16  | Male   | Mandible | Multilocular            |
| 23          | 26  | Male   | Mandible | Multilocular            |
| 24          | 34  | Female | Maxilla  | Unilocular              |
| 25          | 32  | Male   | Mandible | Multilocular            |
| 26          | 18  | Female | Mandible | Multilocular            |
| 27          | 43  | Male   | Maxilla  | Unilocular              |
| 28          | 29  | Male   | Mandible | Unilocular              |

|    |    |        |          |              |
|----|----|--------|----------|--------------|
| 29 | 14 | Male   | Mandible | Multilocular |
| 30 | 25 | Female | Maxilla  | Multilocular |
| 31 | 16 | Male   | Mandible | Unilocular   |
| 32 | 28 | Female | Mandible | Unilocular   |
| 33 | 14 | Male   | Mandible | Unilocular   |

**Table S2. Demographic characteristics of 33 patients with odontogenic keratocysts.**
